# Supplementary material
Source: PubMed Central journal article supplement (PMC4725326)

Supplemental Figure 1

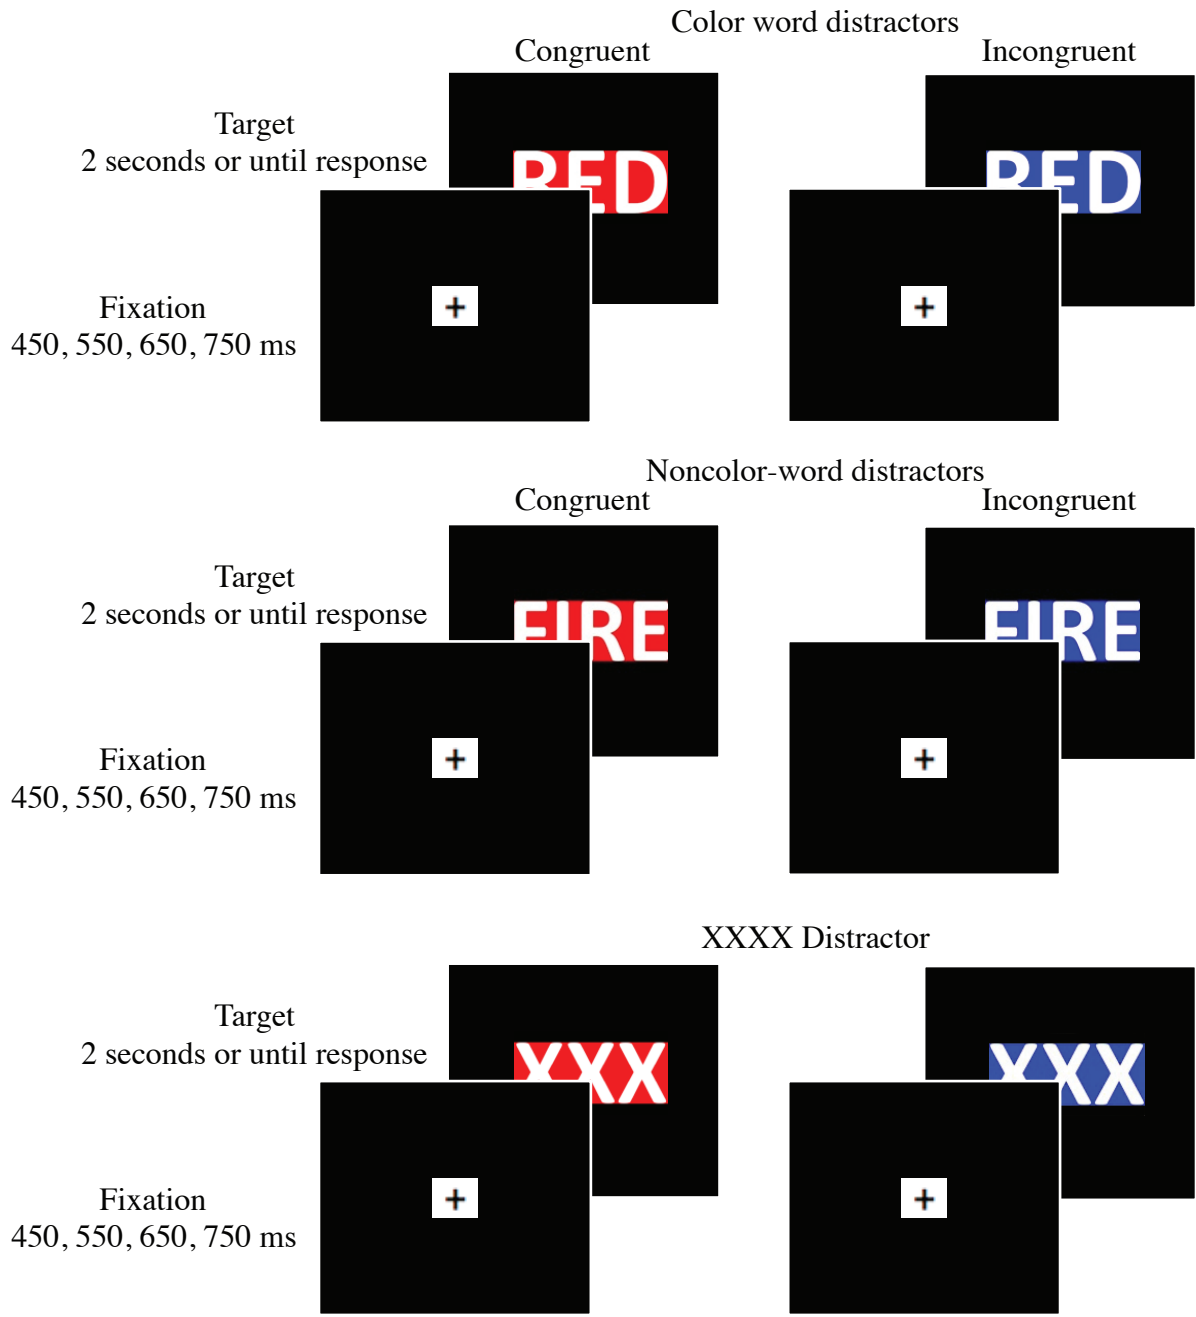

Supplement: NIHMS752967-supplement-1.pdf [file NIHMS752967-supplement-1.pdf]
